# Supplementary material for: Costs of integrating HIV self-testing in public health facilities in Malawi, South Africa, Zambia and Zimbabwe
Source: HighWire-hosted journal article supplement (doi:10.1136/bmjgh-2021-005191), 2021-07-01
Supplement: bmjgh-2021-005191supp001_data_supplement.pdf [file bmjgh-2021-005191supp001_data_supplement.pdf]

**Figures A1-A4: Distribution pathways by country****Figure A1: Zambia distribution approach**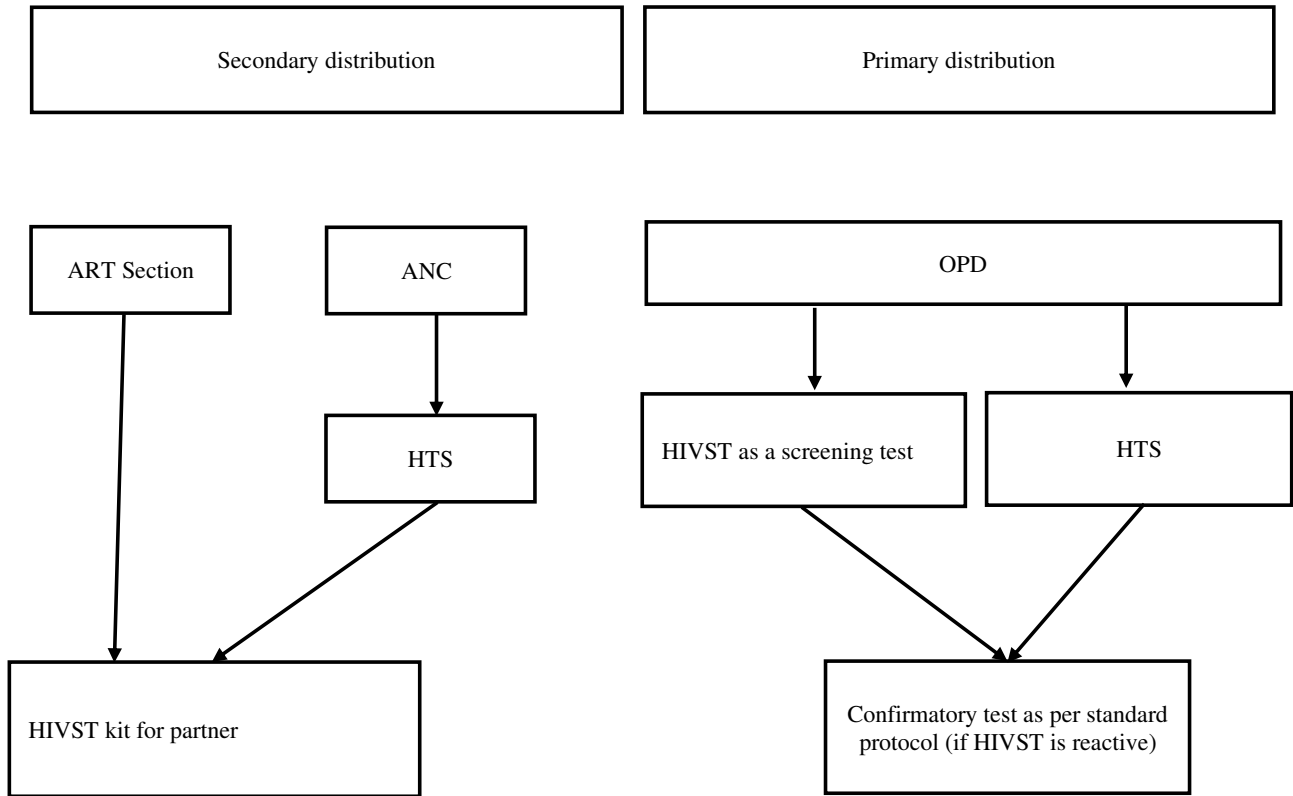**Key**

ANC: Antenatal care  
ART: Antiretroviral therapy  
HIVST: HIV self-testing  
HTS: HIV testing services  
OPD: Outpatient department

**Figure A2: South Africa distribution approach**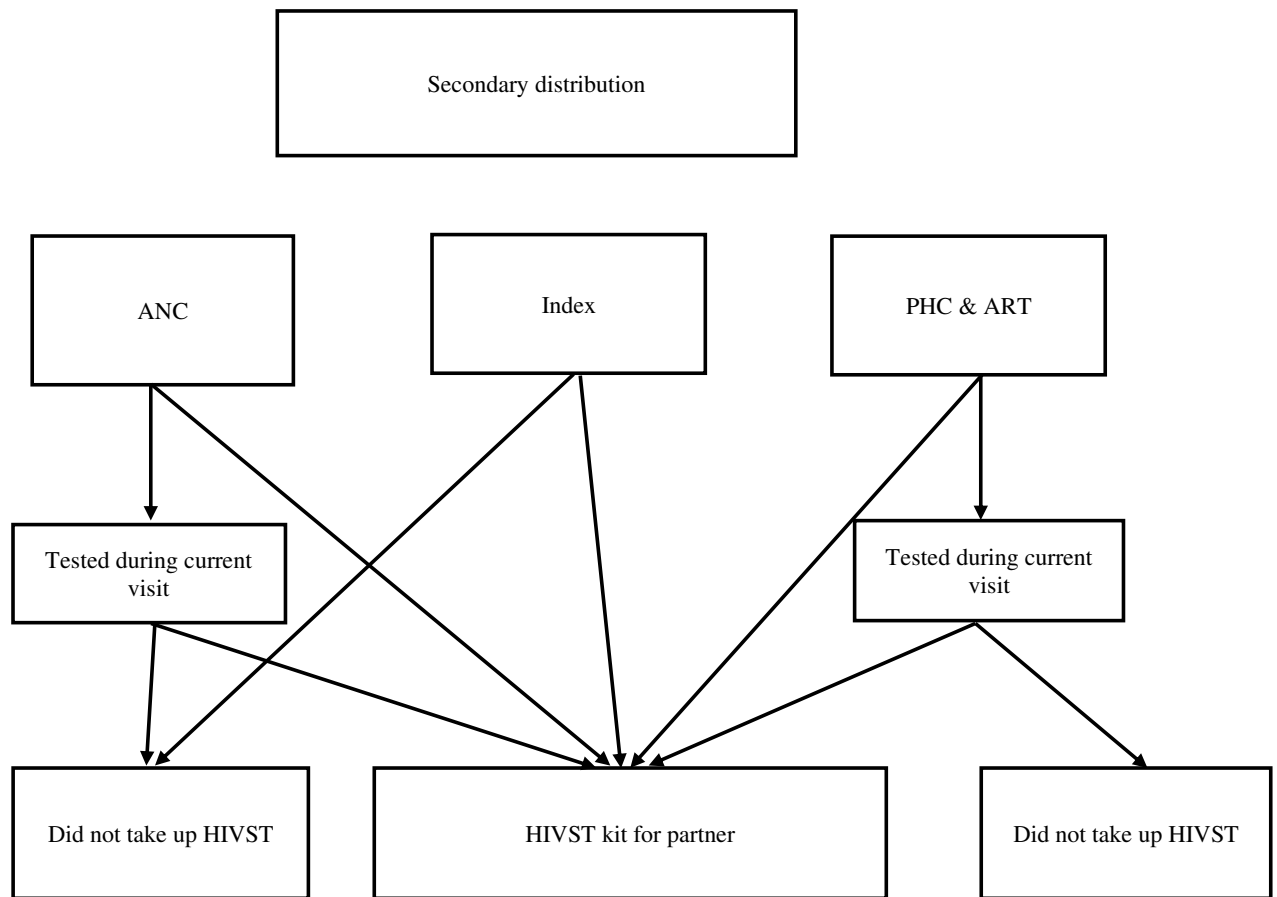**Key**

ANC: Antenatal care  
ART: Antiretroviral therapy  
HIVST: HIV self-testing  
PHC: Primary health care

**Figure A3: Malawi distribution approach**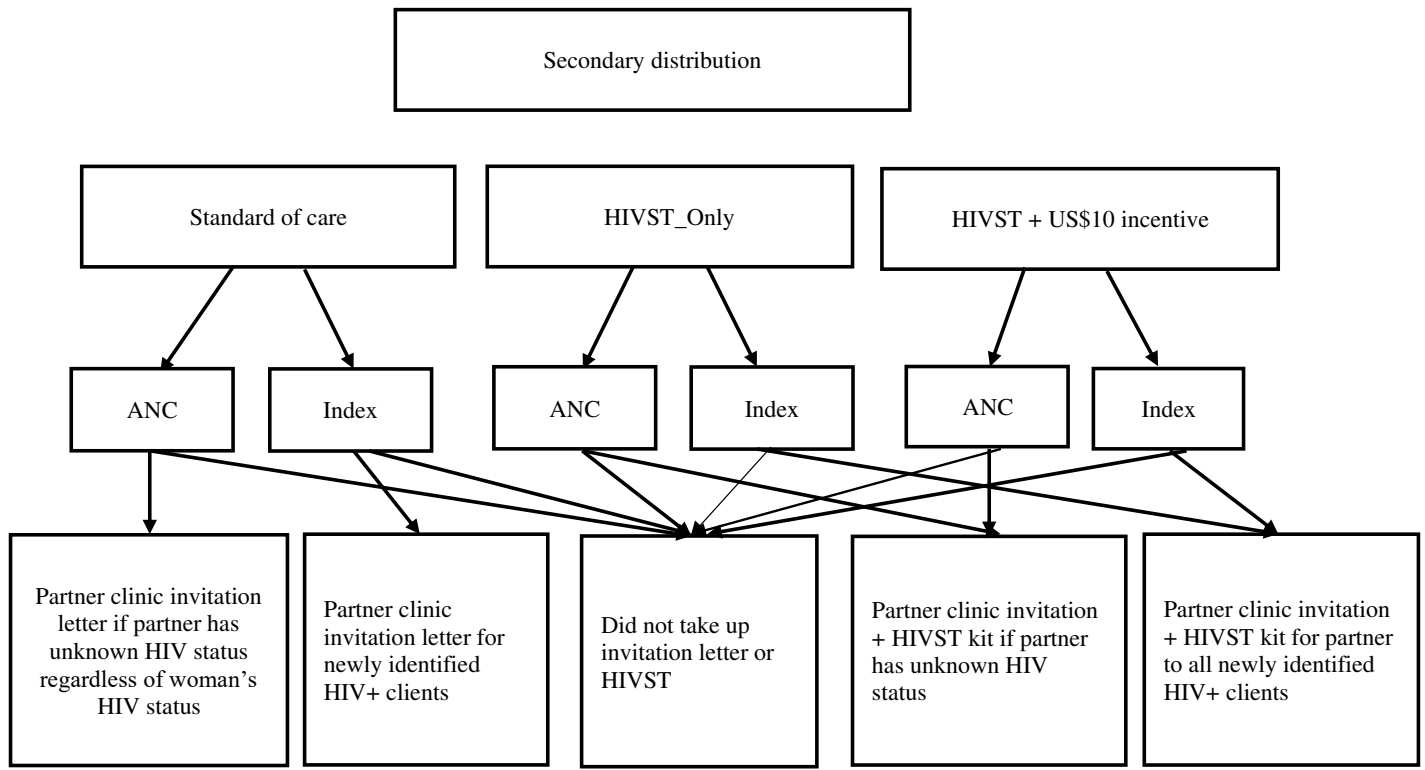**Key**

ANC: Antenatal care

HIVST: HIV self-testing

**Figure A4: Zimbabwe distribution approach**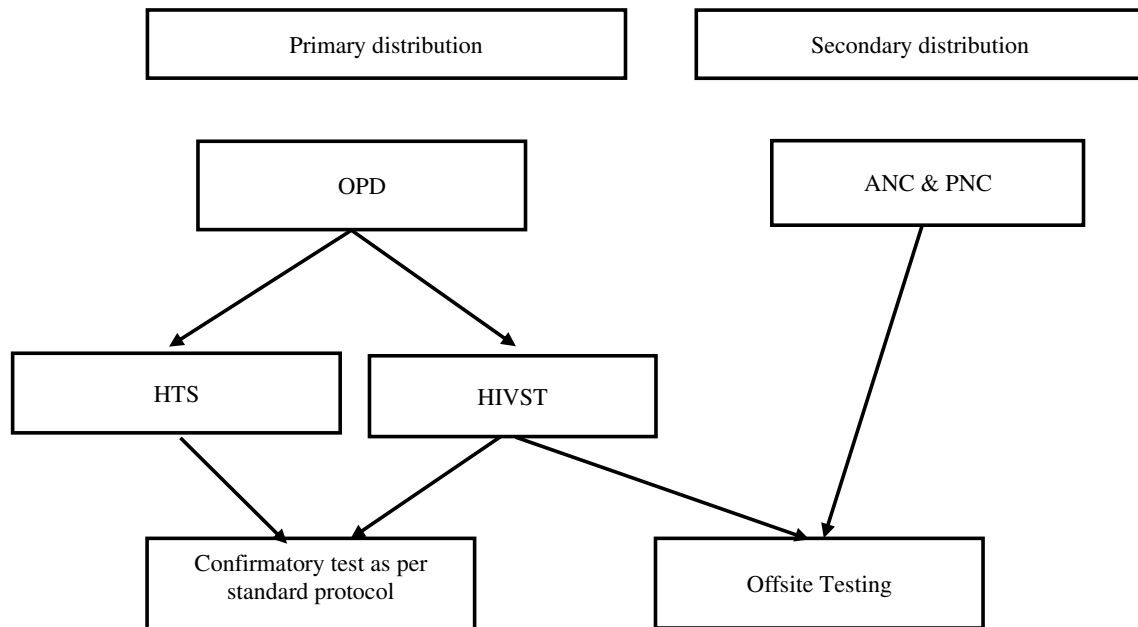**Key**

ANC: Antenatal care

HIVST: HIV self-testing

HTS: HIV testing services

OPD: Outpatient department

PNC: Prenatal care

**Table A1: Allocation Factors by Country\***

| Cost Item             | Allocation factor/Annualization assumption by country                                      |                                                        |                                                                                                               |                                                                                             |
|-----------------------|--------------------------------------------------------------------------------------------|--------------------------------------------------------|---------------------------------------------------------------------------------------------------------------|---------------------------------------------------------------------------------------------|
|                       | Malawi                                                                                     | South Africa                                           | Zambia                                                                                                        | Zimbabwe                                                                                    |
| Training              | Proportion of distributors trained & direct expenditure/2 years lifespan; 3% discount rate | Direct expenditure/2 years lifespan; 3% discount rate  | Staff proportion/2 years lifespan; 3% discount rate                                                           | Proportion of distributors trained & direct expenditure/ 2 years lifespan; 3% discount rate |
| Sensitization         | Direct expenditure/2 years lifespan; 3% discount rate                                      | Direct expenditure/2 years lifespan; 3% discount rate  | Client numbers/ 2 years lifespan; 3% discount rate                                                            | Direct expenditure/2 years lifespan; 3% discount rate                                       |
| Other start-Up costs  | N/A                                                                                        | Direct expenditure/2 years lifespan; 3% discount rate  | N/A                                                                                                           | N/A                                                                                         |
| Building & storage    | Direct expenditure/2 years lifespan; 3% discount rate                                      | Direct expenditure/2 years lifespan; 3% discount rate  | Space proportion/2 years lifespan; 3% discount rate                                                           | Proportion of kits distributed/2 years lifespan; 3% discount rate                           |
| Equipment             | Direct expenditure/2 years lifespan; 3% discount rate                                      | Direct expenditure/ 2 years lifespan; 3% discount rate | Space proportion/2 years lifespan; 3% discount rate                                                           | Proportion of kits distributed/2 years lifespan; 3% discount rate                           |
| Vehicle capital costs | Vehicle mileage                                                                            | Vehicle mileage                                        | Vehicle mileage                                                                                               | Vehicle mileage                                                                             |
| Personnel & per diems | Direct expenditure & Staff proportion                                                      | Direct expenditure & Staff proportion                  | Staff proportion                                                                                              | Staff time                                                                                  |
| Supplies              | Proportion of kits distributed                                                             | Proportion of kits distributed                         | Space proportion for cleaning supplies, staff proportion for stationery & client numbers for medical supplies | Proportion of kits distributed                                                              |
| Test kits             | Kits distributed                                                                           | Kits distributed                                       | Kits distributed                                                                                              | Kits distributed                                                                            |
| Vehicle operation     | Vehicle mileage                                                                            | Vehicle mileage & Direct expenditure                   | Vehicle mileage                                                                                               | Vehicle mileage                                                                             |
| Building operation    | Direct expenditure                                                                         | Direct expenditure                                     | Space proportion                                                                                              | Space proportion                                                                            |
| Recurrent training    | N/A                                                                                        | N/A                                                    | Staff proportion                                                                                              | N/A                                                                                         |
| Other recurrent costs | Proportion of kits distributed                                                             | Direct expenditure                                     | Staff proportion                                                                                              | N/A                                                                                         |
| Waste management      | N/A                                                                                        | N/A                                                    | Client numbers                                                                                                | N/A                                                                                         |

\*All costs were incremental to existing testing services

**Table A2: Sensitivity Analysis**

| <b>Variable</b>                       | <b>Variation</b>                                                                                                                              |
|---------------------------------------|-----------------------------------------------------------------------------------------------------------------------------------------------|
| Discount rate                         | 0%                                                                                                                                            |
|                                       | 3% (base)                                                                                                                                     |
|                                       | 15%                                                                                                                                           |
| Project life years                    | 1 year                                                                                                                                        |
|                                       | 2 years (base)                                                                                                                                |
|                                       | 3 years                                                                                                                                       |
| HIVST kit price                       | Half the kit price                                                                                                                            |
|                                       | Observed kit price (base)                                                                                                                     |
|                                       | Double kit price                                                                                                                              |
| Kit volume                            | Half the number of kits distributed                                                                                                           |
|                                       | Observed number of kits distributed (base)                                                                                                    |
|                                       | Double the number of kits distributed                                                                                                         |
| Time spent on HIVST by health workers | Half the amount of time health care workers spent on HIV self-testing                                                                         |
|                                       | The observed amount of time health care workers spent on HIV self-testing/Reported proportion amount of time spent on HIV self-testing (base) |
|                                       | Double the amount of time health care workers spent on HIV self-testing                                                                       |
| Best case                             | 0% discount rate, 3 years lifespan and half the amount of time health care workers spent on HIV self-testing                                  |
| Worst case                            | 15% discount rate, 1 year lifespan and double HIVST staff time                                                                                |
